# Supplementary material for: Experimental and DFT studies of gadolinium decorated graphene oxide materials for their redox properties and as a corrosion inhibition barrier layer on Mg AZ13 alloy in a 3.5% NaCl environment
Source: Royal Society of Chemistry journal article supplement (doi:10.1039/d1ra03495b), 2021-01-01
Supplement: d1ra03495b1.pdf [file d1ra03495b1.pdf]

## **Experimental and DFT studies of gadolinium decorated graphene oxide materials for their redox properties and as corrosion inhibition barrier layer on Mg AZ13 alloy in a 3.5% NaCl environment**

Palaniappan. N,<sup>a\*</sup> Ivan Cole,<sup>b\*</sup> A. Kuznetsov,<sup>c</sup> K.R. Justin Thomas,<sup>d</sup> Balasubramanian K.<sup>e</sup> Sivakumar Manickam<sup>f</sup>

<sup>a</sup>School of Chemical Sciences, Central University of Gujarat, India

<sup>b</sup>Advanced Manufacturing and Fabrication Research and Innovation, RMIT University, Melbourne, Victoria 3100, Australia

<sup>c</sup>Department of Chemistry, Universidad Técnica Federico Santa María, Campus Vitacura, Santiago, Chile

<sup>d</sup>Organic Materials Laboratory, Department of Chemistry, Indian Institute of Technology Roorkee, Roorkee 247667, India

<sup>e</sup>Department of Materials Engineering, Defence Institute of Advanced Technology (DU), Girinagar, Pune, India

<sup>f</sup>Petroleum and Chemical Engineering, Faculty of Engineering, Universiti Teknologi Brunei, Bandar Seri Begawan BE1410, Brunei Darussalam

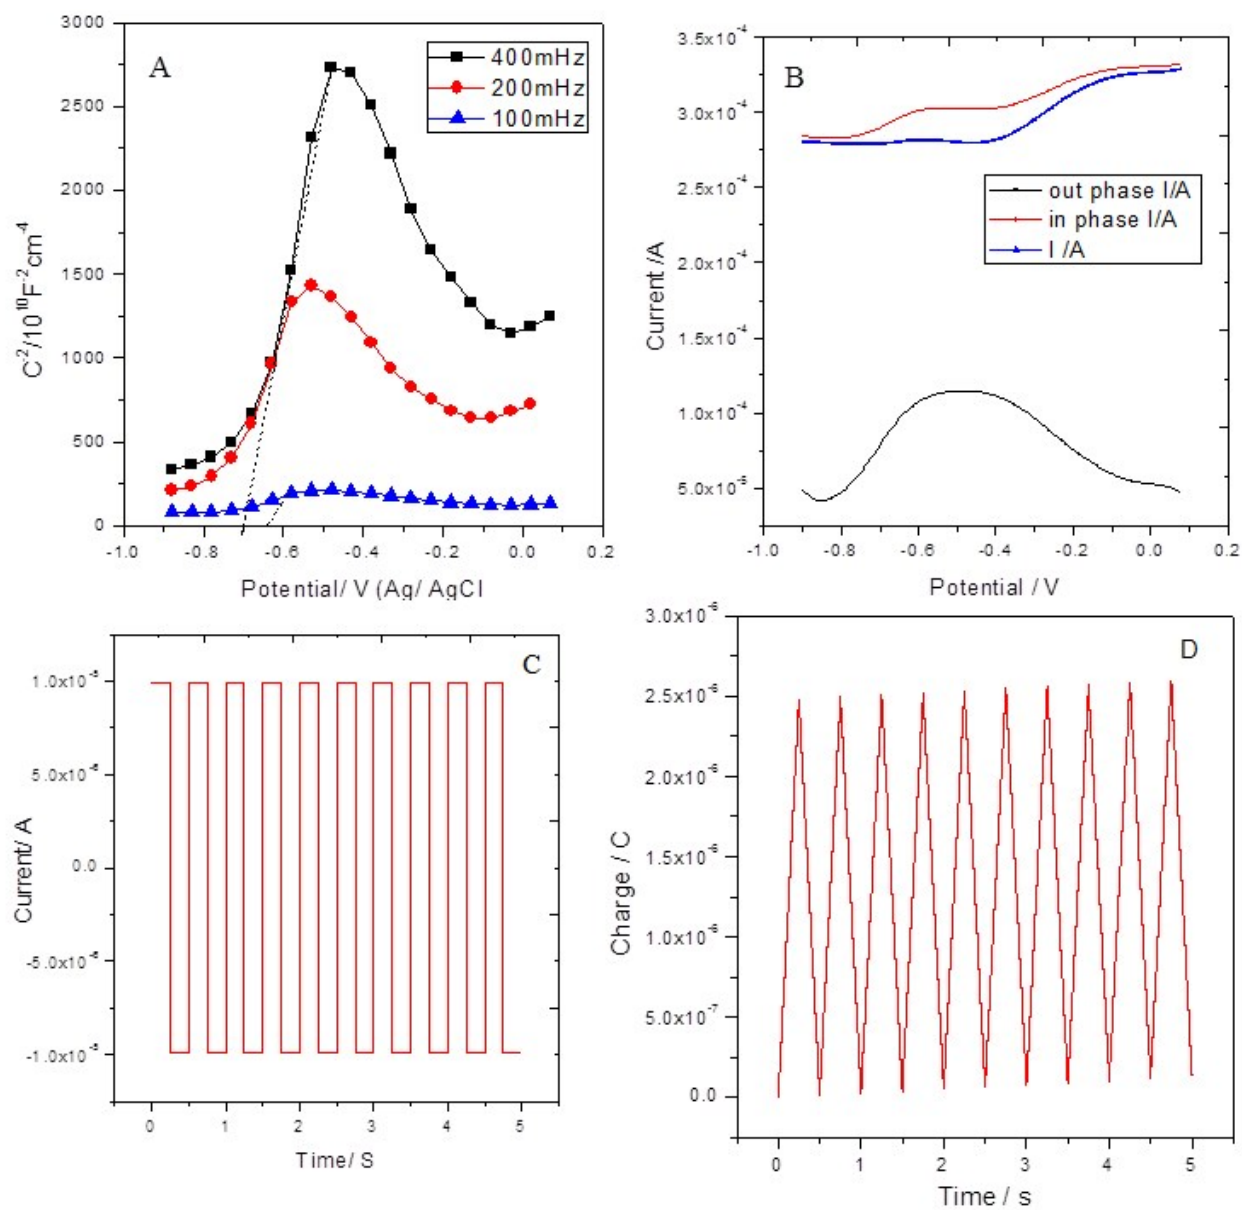

**Figure S1. Motto-Schottky (a) AC-voltammetry (b) chronoamperometry (c) chronocoulometry (d) studies of Gd functionalized graphene oxide.**

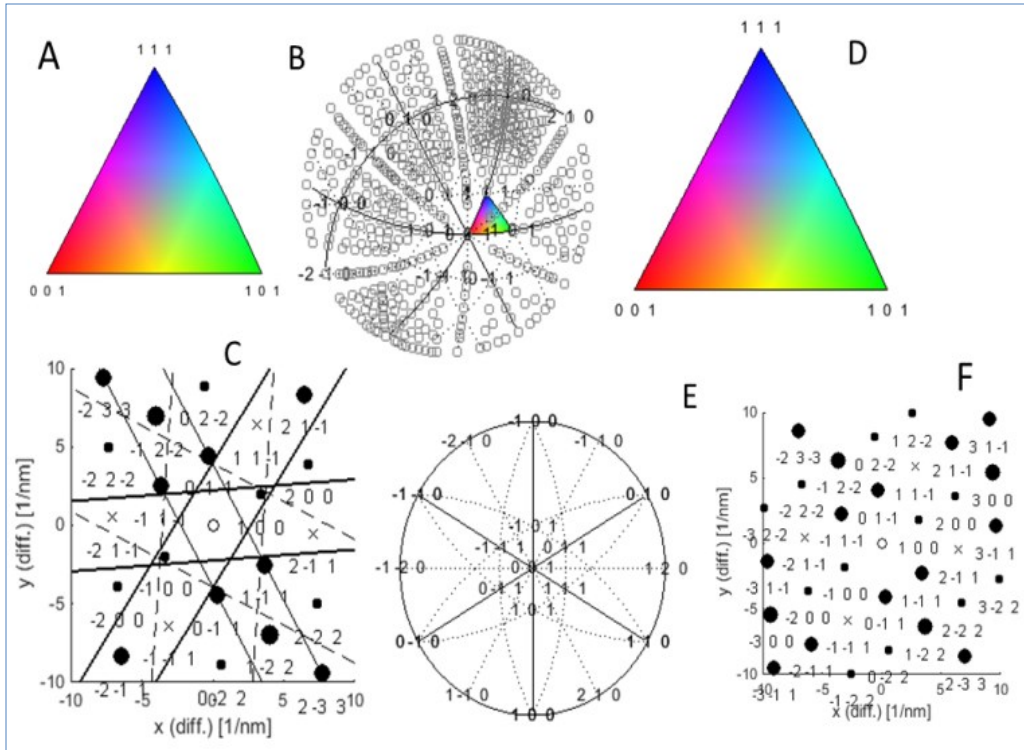

Figure S2. Epoxy and Gd+GO composite coated polycrystalline affected region of the Mg alloy surface.

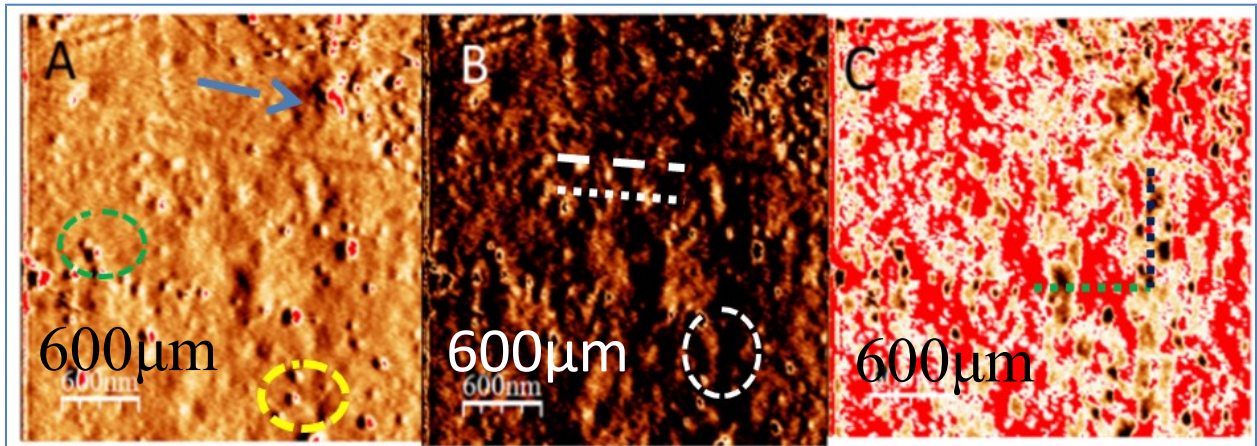

Figure S3. Topography of the epoxy coated Mg alloy immersed for 5 days in 3.5% NaCl solution.

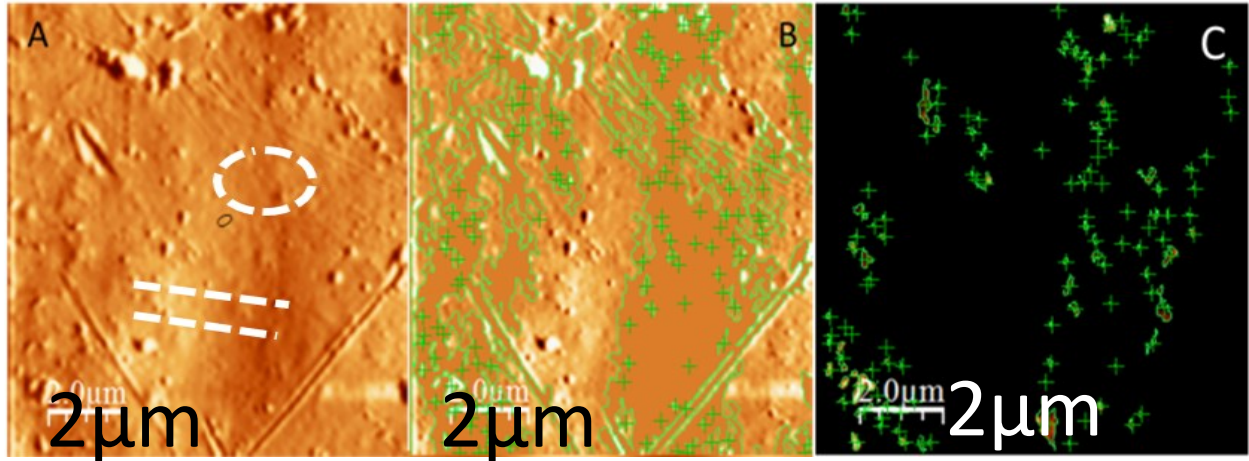

**Figure S4. Topography of epoxy coated Mg alloy immersed for 5 days in 3.5% NaCl corrosion medium**

| S.no  | $-E_{\text{Corr}}$ mV | $-I_{\text{Corr}}$ mA | LP   | $\eta$ | $R_{\text{Ct}}\Omega$ | $C_{\text{dl}}\mu\text{F}$ |
|-------|-----------------------|-----------------------|------|--------|-----------------------|----------------------------|
| Epoxy | 1.385                 | 6.42                  | 382  |        | 450                   | 3.5710                     |
| Gd+GO | 1.899                 | 2.61                  | 1408 | 59     | 700                   | 0.1136                     |

**Table S1. Epoxy and Gd+GO coated Mg alloy corrosion inhibition efficiency**

|            | HOMO         | LUMO     | $\Delta E$  | I           | A           | $\chi$   | $\beta$     | $\sigma$ | $\omega$    |
|------------|--------------|----------|-------------|-------------|-------------|----------|-------------|----------|-------------|
| NEUTRAL    |              |          |             |             |             |          |             |          |             |
| A          | -<br>0.21757 | -0.16128 | 0.0562<br>9 | 0.2175<br>7 | 0.1612<br>8 | 0.189425 | 0.0281<br>5 | 35.524   | 0.6373<br>3 |
| B          | -<br>0.21716 | -0.16033 | 0.0568<br>3 | 0.2171<br>6 | 0.1603<br>3 | 0.188745 | 0.0284<br>2 | 35.186   | 0.6267<br>5 |
| PROTONATED |              |          |             |             |             |          |             |          |             |
| A          | -<br>0.22866 | -0.17520 | 0.0534<br>6 | 0.2286<br>6 | 0.1752<br>0 | 0.20193  | 0.0267<br>3 | 37.411   | 0.7627<br>3 |
| B          | -<br>0.22859 | -0.17475 | 0.0538<br>4 | 0.2285<br>9 | 0.1747<br>5 | 0.20167  | 0.0269<br>2 | 37.147   | 0.7554<br>1 |

**Table S2. Global reactivity parameters computed for the Gd-GO system (with the implicit effects from water), for the neutral and protonated models (A.U.): HOMO-LUMO gap  $\Delta E$ , ionization potential  $I$ , electron affinity  $A$ , global electrophilicity  $\chi$ , global hardness  $\eta$ , global softness  $\sigma$ , and global nucleophilicity  $\omega$ . A =  $\alpha$ -HOMO & LUMO, B =  $\alpha$ -HOMO & LUMO.**
